# Supplementary material for: Spatial analysis of factors impacting lower limb major amputation rates in Hungary
Source: Atypon-hosted journal article supplement (doi:10.1024/0301-1526/a000995), 2022-03-11
Supplement: 0301-1526_a000995_esm2.pdf [file 0301-1526_a000995_esm2.pdf]

## Electronic supplementary material

### ESM 2. Average characteristics of the local administrative units (LAU) in Hungary

| Variable                   | Average | SD     | Min  | Max     |
|----------------------------|---------|--------|------|---------|
| Population [n]             | 49,622  | 40,845 | 8282 | 234,090 |
| Area [km <sup>2</sup> ]    | 470     | 283.6  | 2    | 1591    |
| Average age [y]            | 40.2    | 1.8    | 34.5 | 44.2    |
| Proportion of male sex [%] | 48.2    | 1.0    | 45.0 | 51.7    |

*Notes.* Data represents the yearly average in the parameters between 2017 and 2019.  
Abbreviations: SD = standard deviation.
