# Supplementary material for: Spatial analysis of factors impacting lower limb major amputation rates in Hungary
Source: Atypon-hosted journal article supplement (doi:10.1024/0301-1526/a000995), 2022-03-11
Supplement: 0301-1526_a000995_esm3.pdf [file 0301-1526_a000995_esm3.pdf]

## Electronic supplementary material

### ESM 3. Model comparison of spatial regression models

| Model                               | AIC     | -2LL    | LL ratio | df | p                 |
|-------------------------------------|---------|---------|----------|----|-------------------|
| Spatial Durbin error model (SDEM)   | 1553.4  | -767.72 | -        | -  | -                 |
| Spatially-lagged X model (SLX)      | 1555.48 | -775.50 | 15.56    | 1  | <b>&lt;0.0001</b> |
| Spatial error model (SEM)           | 1555.5  | -771.74 | 8.04     | 3  | <b>0.045</b>      |
| Ordinary linear least-squares model | 1569.80 | -779.90 | 24.36    | 4  | <b>&lt;0.001</b>  |

*Notes.* Abbreviations: AIC = Akaike information criterion; df = degrees of freedom; LL = log-likelihood. Bold numbers indicate p values below the statistical significance threshold of 0.05.
